# Supplementary material
Source: Springer Nature journal article supplement (https://www.springermedizin.de/resource/supplementary/13045_2009_95_MOESM1_ESM.pdf/9660652)
Supplement: MOESM1 [file 9660652]

~3,800 patients with  
advanced  
gastroesophageal  
junction or gastric  
adenocarcinoma

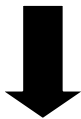

Screened for HER2  
overexpression with 3+  
immunohistochemistry  
and/or positive  
fluorescent in-situ  
hybridization

R  
A  
N  
D  
O  
M  
I  
Z  
E

294 patients:  
Cisplatin and  
fluoropyrimidine for 6  
cycles, plus trastuzumab  
every 3 weeks until  
progression

290 patients:  
Cisplatin and  
fluoropyrimidines for 6  
cycles
